# Supplementary material for: Effect of high versus low dose of dexamethasone on clinical worsening in patients hospitalised with moderate or severe COVID-19 pneumonia: an open-label, randomised clinical trial
Source: PubMed Central journal article supplement — Eur Respir J. 2022 Aug 4;60(2):2102518. doi: 10.1183/13993003.02518-2021 (PMC8678498; doi:10.1183/13993003.02518-2021), 2022-08-04

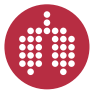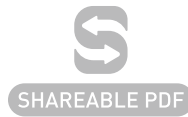

# Effect of high *versus* low dose of dexamethasone on clinical worsening in patients hospitalised with moderate or severe COVID-19 pneumonia: an open-label, randomised clinical trial

Manuel Taboada<sup>1</sup>, Nuria Rodríguez<sup>2</sup>, Pablo Manuel Varela<sup>3</sup>, María Teresa Rodríguez<sup>4</sup>, Romina Abelleira<sup>2</sup>, Amara González<sup>3</sup>, Ana Casal<sup>2</sup>, José Antonio Díaz Peromingo<sup>3</sup>, Adriana Lama<sup>2</sup>, María Jesús Domínguez<sup>3</sup>, Carlos Rábade<sup>2</sup>, Emilio Manuel Páez<sup>3</sup>, Vanessa Riveiro<sup>2</sup>, Hadrián Pernas<sup>3</sup>, María del Carmen Beceiro<sup>3</sup>, Valentín Caruezo<sup>1</sup>, Alberto Naveira<sup>1</sup>, Agustín Cariñena<sup>1</sup>, Teresa Cabaleiro<sup>5</sup>, Ana Estany-Gestal<sup>5</sup>, Irene Zarra<sup>4</sup>, Antonio Pose<sup>3</sup>, Luis Valdés<sup>2</sup> and Julián Álvarez-Escudero<sup>1</sup>

<sup>1</sup>Dept of Anesthesiology and Intensive Care Medicine, Clinical University Hospital of Santiago, Sanitary Research Institute of Santiago (IDIS), Santiago de Compostela, Spain. <sup>2</sup>Dept of Pneumology, Clinical University Hospital of Santiago, Santiago de Compostela, Spain. <sup>3</sup>Dept Internal Medicine, Clinical University Hospital of Santiago, Santiago de Compostela, Spain. <sup>4</sup>Dept Pharmacology, Clinical University Hospital of Santiago, Santiago de Compostela, Spain. <sup>5</sup>Research Methodology Unit, Fundación Instituto de Investigaciones Sanitarias (FIDIS), Santiago de Compostela, Spain.

Corresponding author: Manuel Taboada ([manutabo@yahoo.es](mailto:manutabo@yahoo.es))

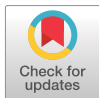

Shareable abstract (@ERSpublications)

This study showed that in hospitalised COVID-19 patients with moderate or severe COVID-19 pneumonia needing oxygen therapy, high dose of dexamethasone reduced clinical worsening within 11 days after randomisation compared with low dose of dexamethasone <https://bit.ly/3dBe5Aa>

**Cite this article as:** Taboada M, Rodríguez N, Varela PM, *et al.* Effect of high *versus* low dose of dexamethasone on clinical worsening in patients hospitalised with moderate or severe COVID-19 pneumonia: an open-label, randomised clinical trial. *Eur Respir J* 2022; 60: 2102518 [DOI: 10.1183/13993003.02518-2021].

This single-page version can be shared freely online.

Copyright ©The authors 2022.

This version is distributed under the terms of the Creative Commons Attribution Non-Commercial Licence 4.0. For commercial reproduction rights and permissions contact [permissions@ersnet.org](mailto:permissions@ersnet.org)

Received: 18 Sept 2021  
Accepted: 2 Dec 2021

## Abstract

**Background** Low-dose dexamethasone demonstrated clinical improvement in patients with coronavirus disease 2019 (COVID-19) needing oxygen therapy; however, evidence on the efficacy of high-dose dexamethasone is limited.

**Methods** We performed a randomised, open-label, controlled trial involving hospitalised patients with confirmed COVID-19 pneumonia needing oxygen therapy. Patients were randomly assigned in a 1:1 ratio to receive low-dose dexamethasone (6 mg once daily for 10 days) or high-dose dexamethasone (20 mg once daily for 5 days, followed by 10 mg once daily for an additional 5 days). The primary outcome was clinical worsening within 11 days since randomisation. Secondary outcomes included 28-day mortality, time to recovery and clinical status at day 5, 11, 14 and 28 on an ordinal scale ranging from 1 (discharged) to 7 (death).

**Results** A total of 200 patients (mean±SD age 64±14 years; 62% male) were enrolled. 32 (31.4%) out of 102 patients enrolled in the low-dose group and 16 (16.3%) out of 98 in the high-dose group showed clinical worsening within 11 days since randomisation (rate ratio 0.427, 95% CI 0.216–0.842; *p*=0.014). The 28-day mortality was 5.9% in the low-dose group and 6.1% in the high-dose group (*p*=0.844). There was no significant difference in time to recovery, and in the seven-point ordinal scale at days 5, 11, 14 and 28.

**Conclusions** Among hospitalised COVID-19 patients needing oxygen therapy, high dose of dexamethasone reduced clinical worsening within 11 days after randomisation, compared with low dose.

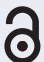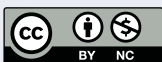

Supplement: ERJ-02518-2021.Shareable.pdf [file ERJ-02518-2021.Shareable.pdf]
